# Supplementary material
Source: PubMed Central journal article supplement (PMC2730157)
Supplement: NIHMS135838-supplement-1.pdf [file NIHMS135838-supplement-1.pdf]

**Supplemental Figure E1**

Figure E1 is a series of scatter plots illustrating a pair-wise correlation between different PiB ROI retention ratios across all 45 subjects in the study. The scale on the vertical and horizontal axis is cortical-to-cerebellar retention ratio. There is extremely high inter-correlation among the six PiB ROI's combined into the global cortical PiB retention measure used in these analyses.

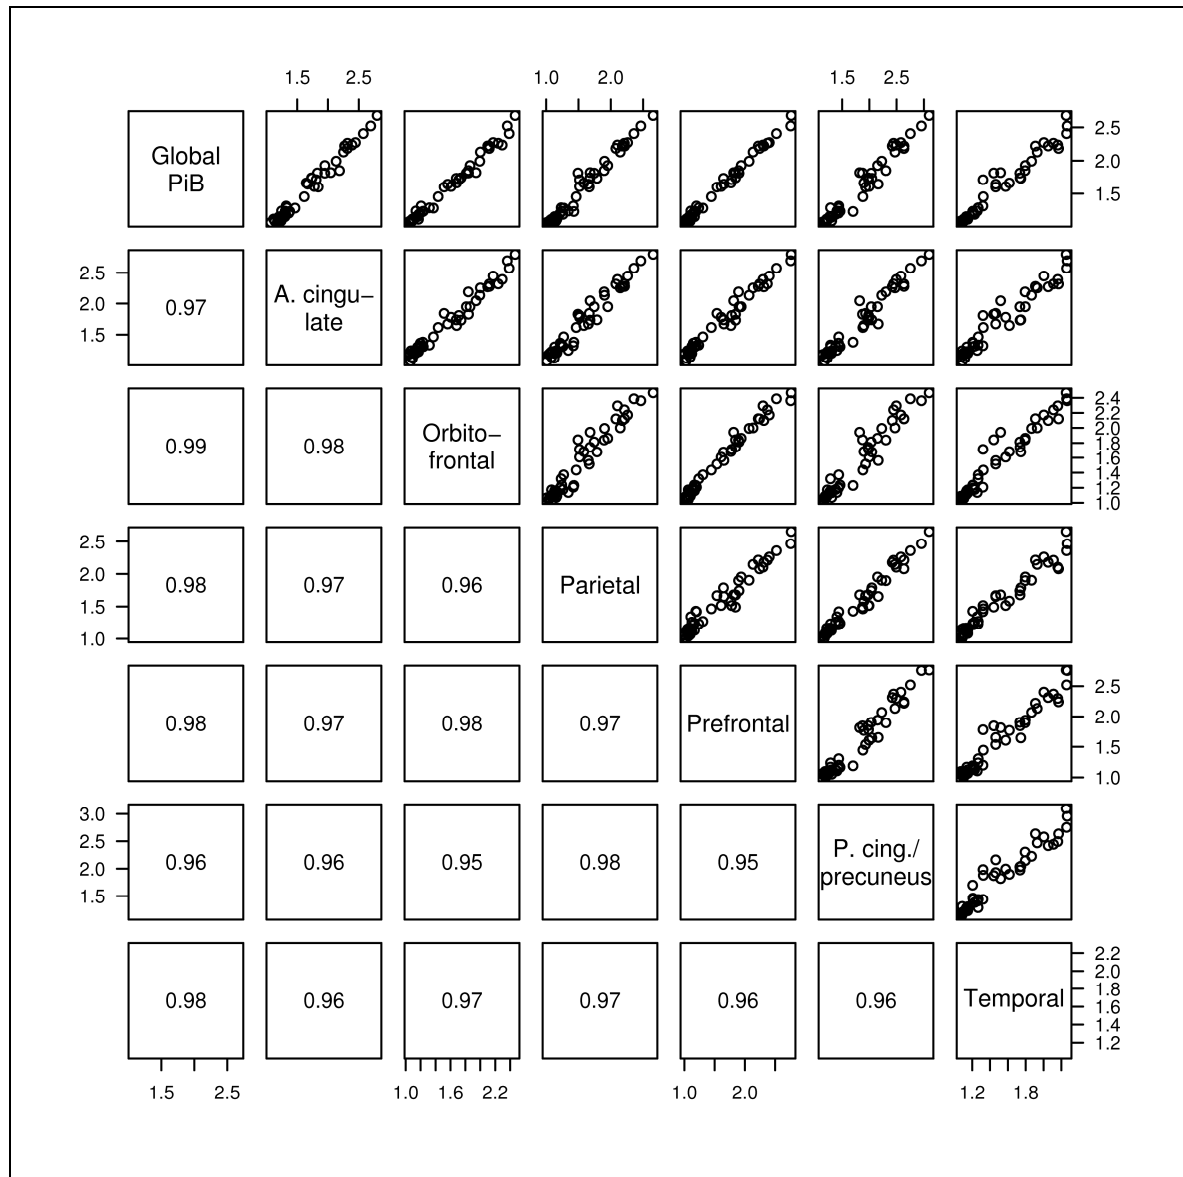

**Figure E1.** Array showing all pair-wise scatter plots (above diagonal) and all pair-wise Spearman rank correlations (below diagonal) for the global cortical PiB retention ratio measure and its constituent ROIs. Plotted values are the subject's median value over all voxels in the region of interest except for global cortical PiB retention ratio which is the median of the subject's constituent ROIs. Note that each correlation is significant at the 0.0001 level.

**Supplemental Table E1:** numeric representation of the values in the quadrants of **Figure 6** by clinical group.

**Table E1.** Number of subjects categorized by PiB and hippocampal W score within each diagnostic group

| Hippocampal W<br>score group | CN             |             | aMCI           |             | AD             |             |
|------------------------------|----------------|-------------|----------------|-------------|----------------|-------------|
|                              | PiB $\leq$ 1.5 | PiB $>$ 1.5 | PiB $\leq$ 1.5 | PiB $>$ 1.5 | PiB $\leq$ 1.5 | PiB $>$ 1.5 |
|                              | W score $>$ 0  | 8           | 3              | 3           | 2              | 0           |
| W score $\leq$ 0             | 6              | 3           | 5              | 7           | 0              | 8           |
